# Supplementary material for: Cardiolipin exposure on the outer mitochondrial membrane modulates α-synuclein
Source: PubMed Central journal article supplement (PMC5827019; doi:10.1038/s41467-018-03241-9), 2018-02-26
Supplement: 41467_2018_3241_MOESM1_ESM.pdf [file 41467_2018_3241_MOESM1_ESM.pdf]

## Supplementary Information

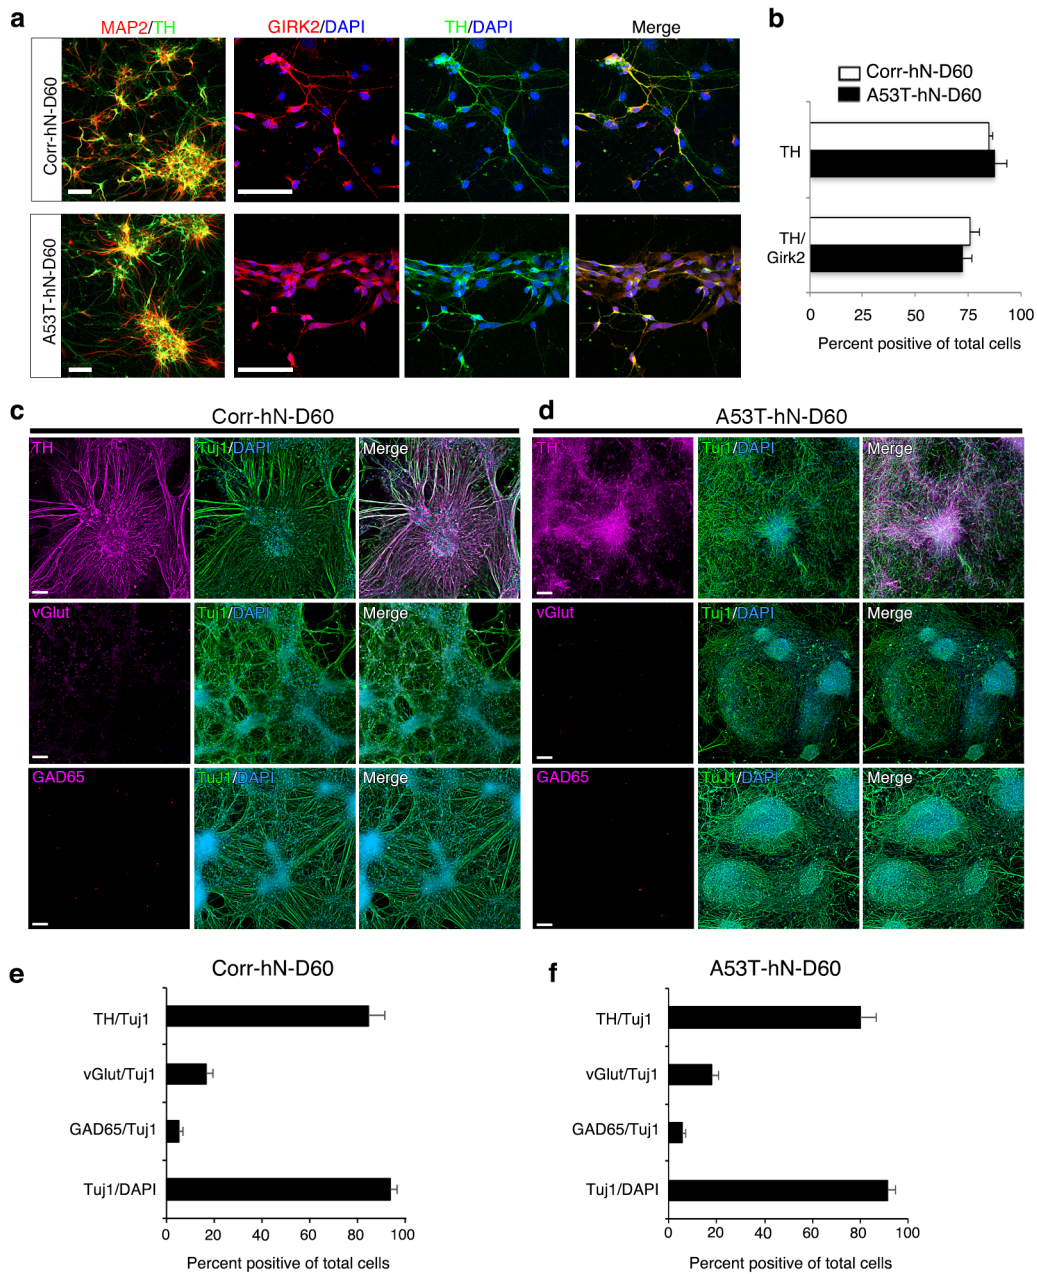

**Supplementary Figure 1 | Characterization of floor plate differentiation. a-f,** Quantification of neuronal subtypes present in differentiated hNs. hiPSC-derived corrected hNs (top panels) and A53T hNs (bottom panels) are both MAP2/TH double-positive and GirK2/TH double-positive at 60 days *in vitro* (DIV). Blue: DAPI. Scale bar: 50  $\mu$ m (a). Quantification of TH-positive and TH-GIRK2 double positive populations. Data represent mean  $\pm$  s.e.m.,  $n = 6$  coverslips over three independent differentiations, DIV: 60 (b). A53T and corrected hNs were antigenically labeled for Tuj1 and either vGlut, Gad65 or TH (c,d) and the percentage of cells expressing each marker was quantified (e,f).  $n = 6$  coverslips from 2 independent differentiations, Blue=DAPI.

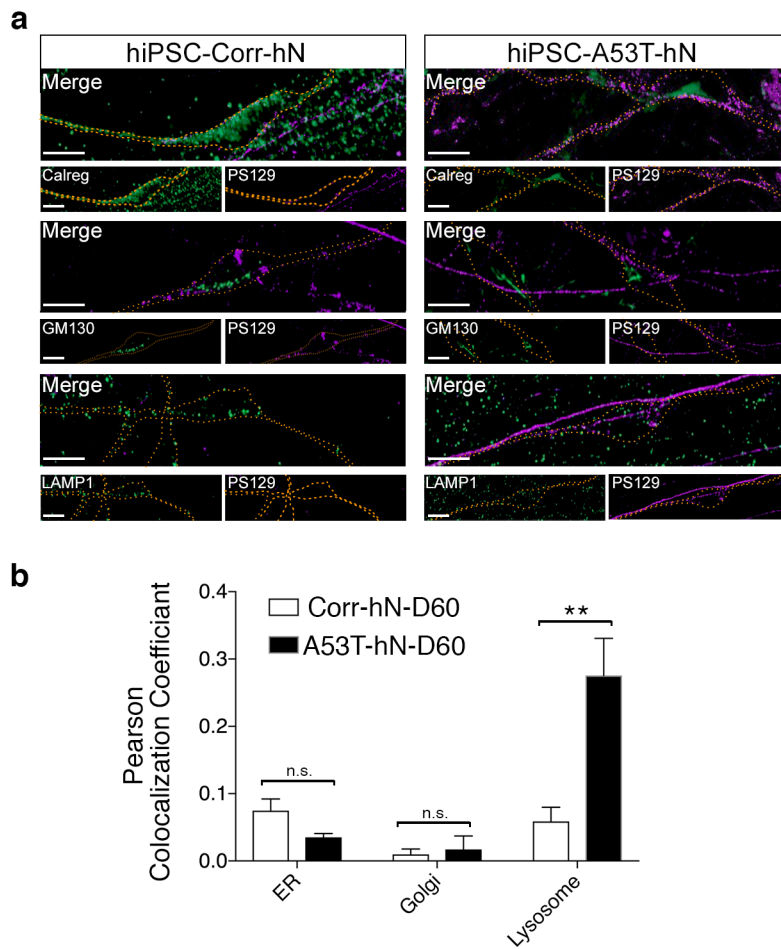

**Supplementary Figure 2 | Subcellular localization of  $\alpha$ -syn-PS129 in  $\alpha$ -syn mutant hNs. a,b**, Micrographs depicting  $\alpha$ -syn-PS129 co-localization with the endoplasmic reticulum (Calregulin), the Golgi Apparatus (GM130) and the lysosomal compartment (LAMP1) (a). Quantification of Pearson co-localization coefficients from samples in panel a (b). Data represent mean + s.e.m. \*\* $P < 0.01$  by ANOVA, posthoc Tukey.  $n = 4$  coverslips from 2 independent differentiations, DIV: 60.

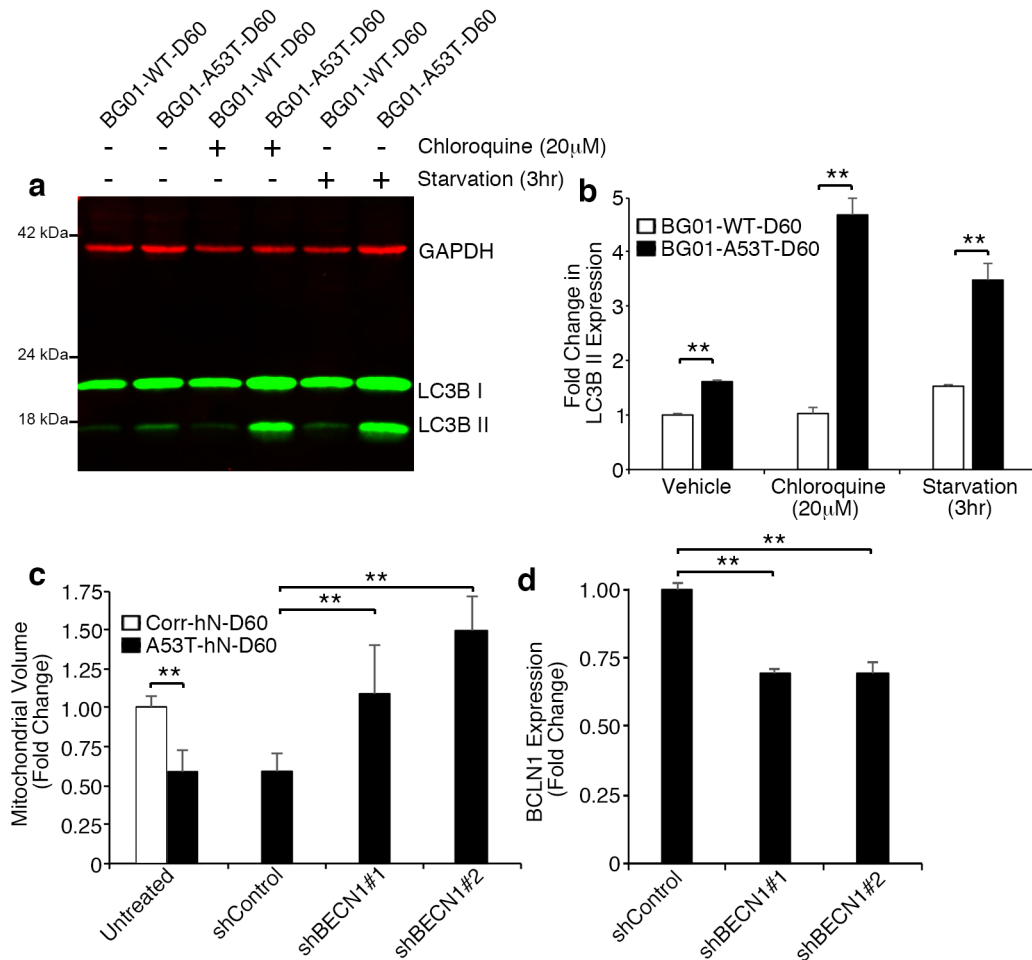

**Supplementary Figure 3 | Characterization of mitochondrial pathology in BG01-WT and BG01-A53T hNs.** **a-b** Steady-state levels of LC3I and LC3II protein expression were monitored by lysosomal inhibition with 20 $\mu$ M chloroquine (**a**). Turnover was induced with 3hrs of starvation. Triplicate experiments were quantified (**b**) relative to GAPDH expression. Data represent mean + s.e.m. **\*\*** $P < 0.01$  by Student t-test,  $n = 3$ . **c**, Quantification of the average mitochondrial volume per neurons for A53T and WT hNs following knock down of the mitophagy gene, Beclin-1 (*BECN1*) or scrambled shRNA control. Data represent mean + s.e.m. **\*\*** $P < 0.01$  by ANOVA followed by Dunnett,  $n = 3$  neurons from 2 independent differentiations, DIV: 60. **d**, Knockdown efficiency of Beclin1 as measured by fold change in mRNA expression. Data represent mean + s.e.m. **\*\*** $P < 0.01$  by ANOVA followed by Dunnett,  $n = 3$  independent experiments.

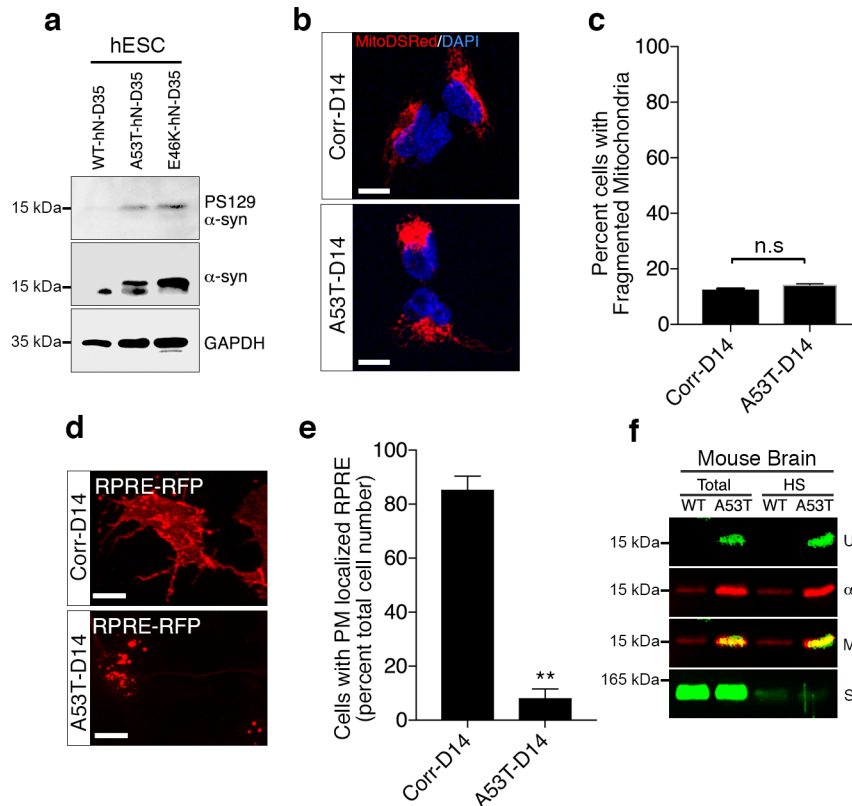

#### Supplementary Figure 4 | Characterization of $\alpha$ -syn accumulation and mitochondrial fragmentation.

**a**, Western blot analysis of lysates from hESC-derived WT, A53T or E46K hNs at DIV 35 labeled for total  $\alpha$ -syn, PS129, or GAPDH shows that levels of PS129 modified  $\alpha$ -syn (14 kDa) are elevated in A53T and E46K hNs. **b,c**, Mitochondrial structure is normal in hiPSC-derived A53T cells at the NPC stage (DIV14) as shown by labelling with MitoDSRed (**b**). Quantification of data (**c**) represent mean  $\pm$  s.e.m.  $P = 0.1647$  by Student  $t$ -test,  $n = 8$  coverslips over 2 independent differentiations, DIV: 14; scale bar: 10  $\mu$ m. **d,e**, Micrographs of hiPSC-derived corrected (left panel) and A53T mutant NPCs at DIV 14, expressing the negative charge probe RPRE-RFP (**d**). RPRE shifts from a primarily plasma membrane localization in isogenic-corrected hNs to a punctate intracellular localization in A53T hNs at DIV 14. Quantification of percentage of hNs with plasma membrane localized RPRE-RFP at DIV14 (**e**). Data represent mean  $\pm$  s.e.m.  $**P < 0.0001$  by Student  $t$ -test,  $n = 6$  coverslips over 2 independent differentiations, DIV: 14; scale bar: 10  $\mu$ m. **f**, Western blot analysis of total and heat stable (HS) lysate from WT and A53T transgenic brain probed for ubiquitylation (Ubq),  $\alpha$ -syn or synaptophysin 1. Merge represents overlay of  $\alpha$ -syn and Ubq.

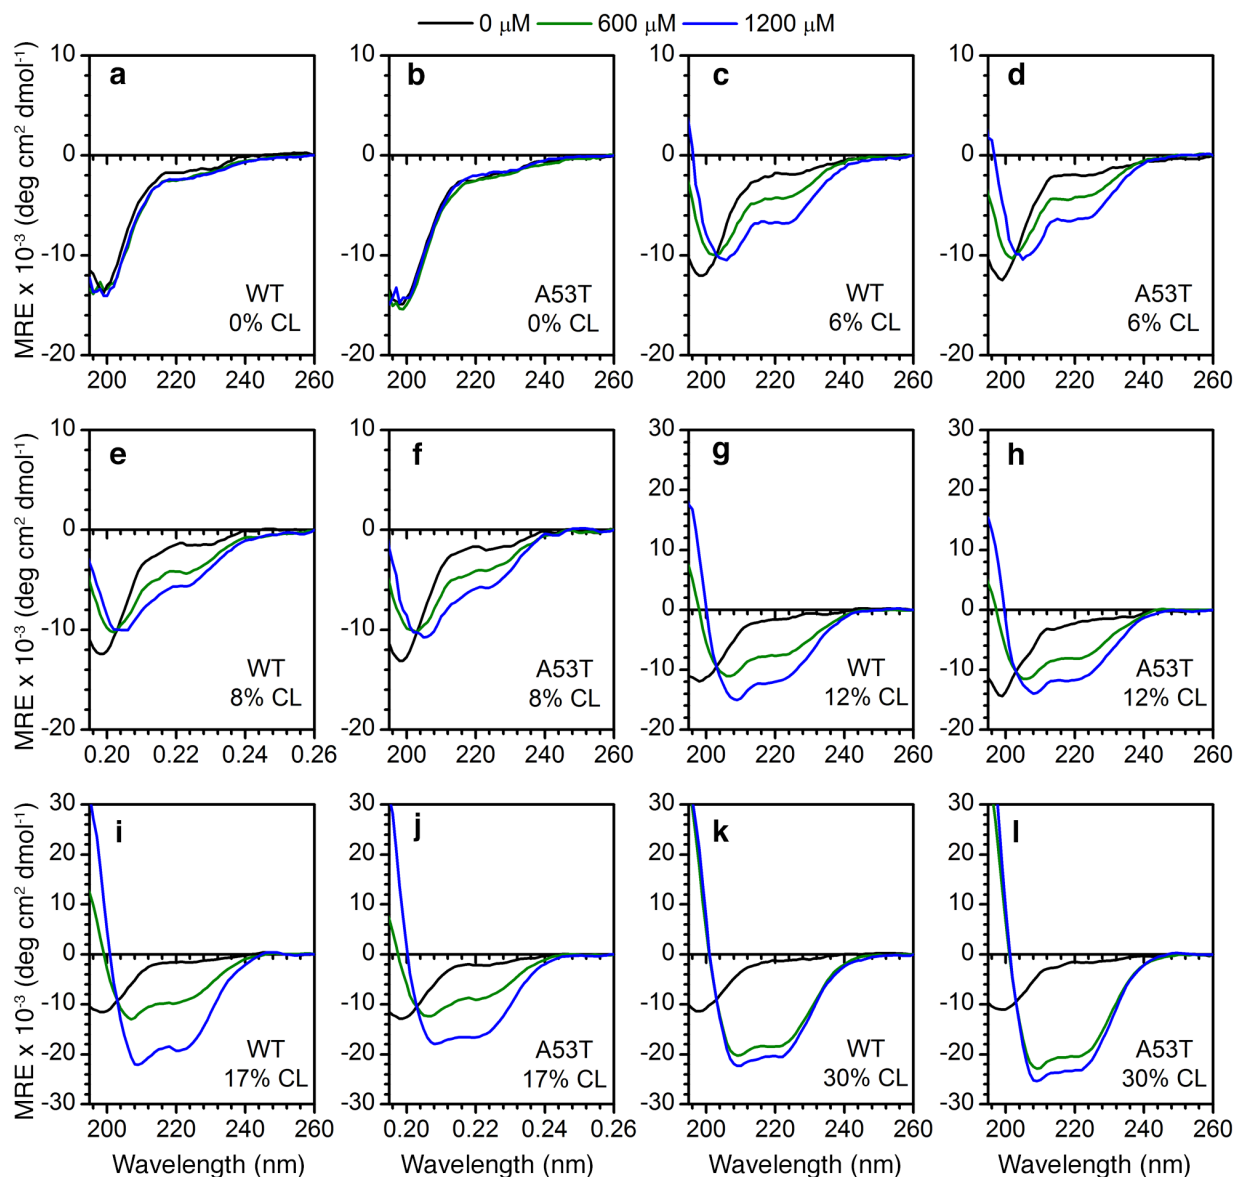

**Supplementary Figure 5 | Effect of large unilamellar lipid vesicles (LUVs) with different cardiolipin (CL) content on folding of WT and A53T  $\alpha$ -syn monomers.** a-l, Six lipid compositions of PI:PC:PS:PE:CL with increasing molar ratio of cardiolipin were used, namely, 9.4:55.2:7.3:28.1:0 (a,b); 8.8:51.9:6.9:26.4:6 (c,d); 8.6:50.8:6.7:25.9:8 (e,f); 8.3:48.6:6.4:24.7:12 (g,h); 7.8:45.8:6.1:23.3:17 (i,j); and 6.6:38.6:5.1:19.7:30 (k,l). Monomeric WT (a,c,e,g,i,k) or A53T (b,d,f,h,j,l)  $\alpha$ -syn (4  $\mu$ M) was incubated in the presence of an increasing concentration of LUVs at 37°C, and the CD spectrum was collected to follow the relative redistribution of the secondary structure components (from mostly random coil in the absence of LUVs to  $\alpha$ -helical structures in their presence).



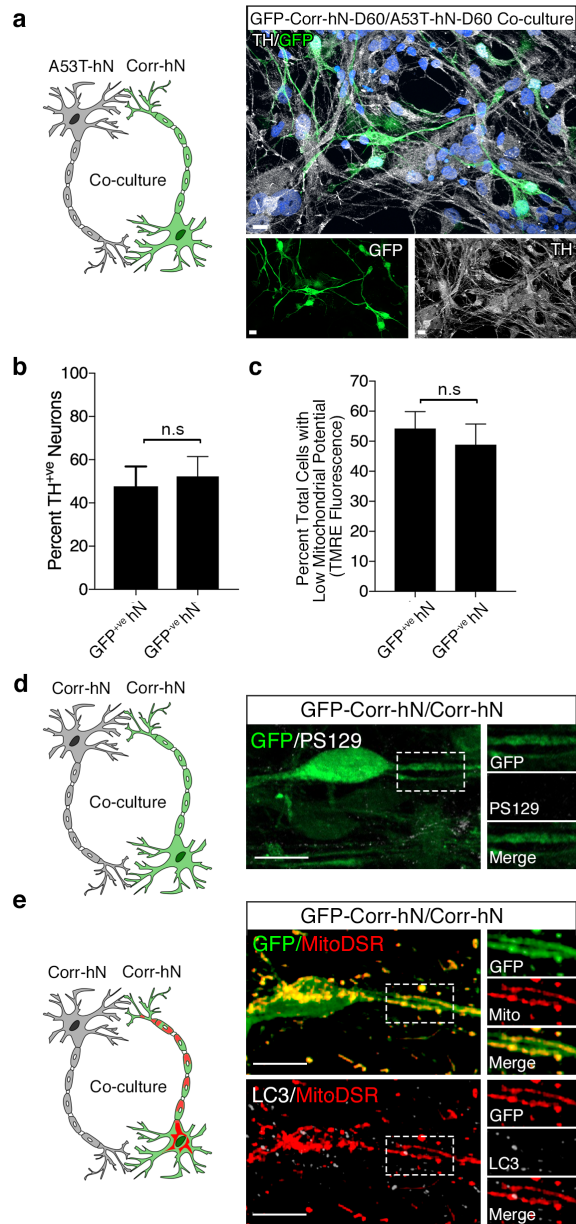

**Supplementary Figure 6 | Characterization of differentiation of A53T and isogenic-corrected hNs in co-culture.** **a,b**, Micrographs of GFP<sup>+</sup>ve isogenic-corrected hNs and GFP<sup>-</sup>ve A53T mutant hNs in co-culture, antigenically-labeled for TH (**a**). Percentage of total TH positive neurons that are GFP<sup>+</sup>ve and GFP<sup>-</sup>ve (**b**). Data represent mean + s.e.m.  $P = 0.3022$  by Student *t*-test,  $n = 10$  coverslips over 2 independent differentiations, DIV: 60. **c**, Percentage of total neurons with depolarized mitochondria. Data represent mean + s.e.m.  $P = 0.5764$  by Student *t*-test,  $n = 3$  cultures from independent differentiations, DIV: 60. **d**, GFP<sup>+</sup>ve isogenic-corrected hNs and GFP<sup>-</sup>ve isogenic-corrected hNs in co-culture, antigenically-labeled for PS129 modified  $\alpha$ -syn. **e**, GFP<sup>+</sup>ve, MitoDSRed<sup>+</sup>ve isogenic-corrected hNs and GFP<sup>-</sup>ve isogenic-corrected hNs in co-culture, antigenically-labeled for LC3. Scale Bar: 10  $\mu$ m.

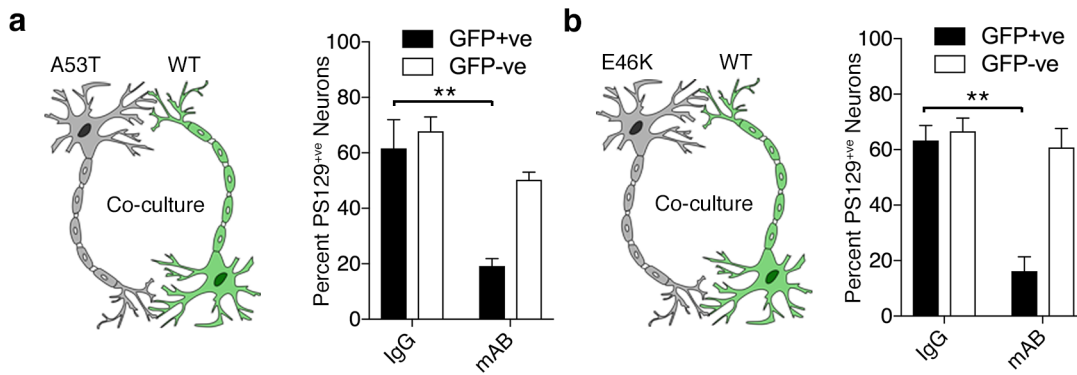

**Supplementary Figure 7 | Blocking  $\alpha$ -syn transmission blocks  $\alpha$ -syn PS129 accumulation.** **a-b**, hESC-derived WT cells expressing GFP were co-cultured with either A53T cells (**a**) or E46K cells (**b**) at DIV 14 and differentiated to hNs (DIV 60) together in the presence of either monoclonal anti- $\alpha$ -syn or IgG control to block  $\alpha$ -syn seeding and percentage PS129 positive neurons was quantified. Data represent mean + s.e.m. **\*\*** $P < 0.0001$  by ANOVA, posthoc Tukey,  $n = 5$  coverslips from 3 independent differentiations, DIV: 60.

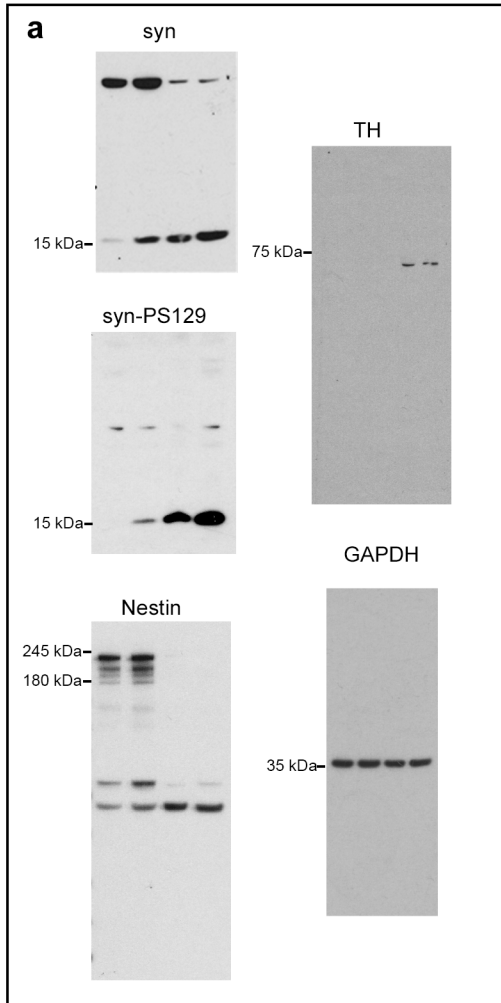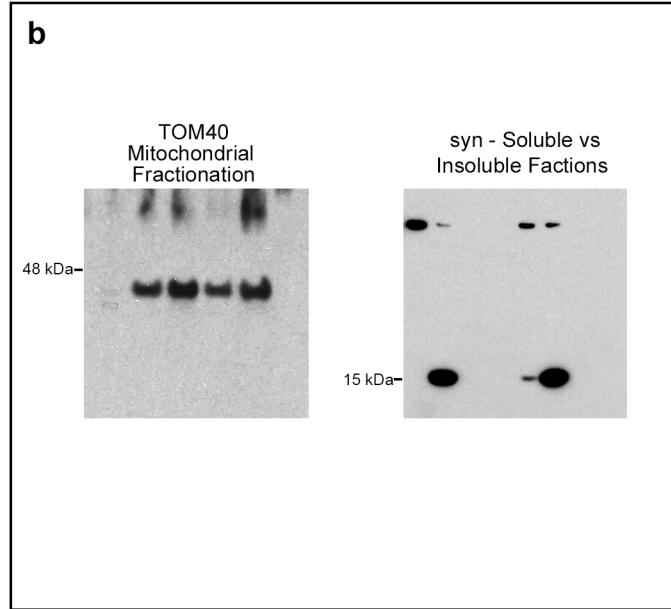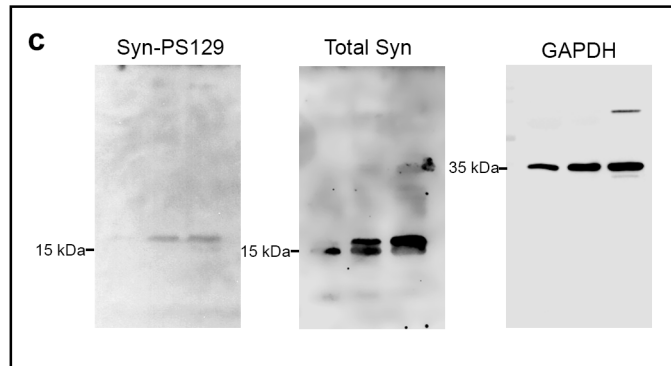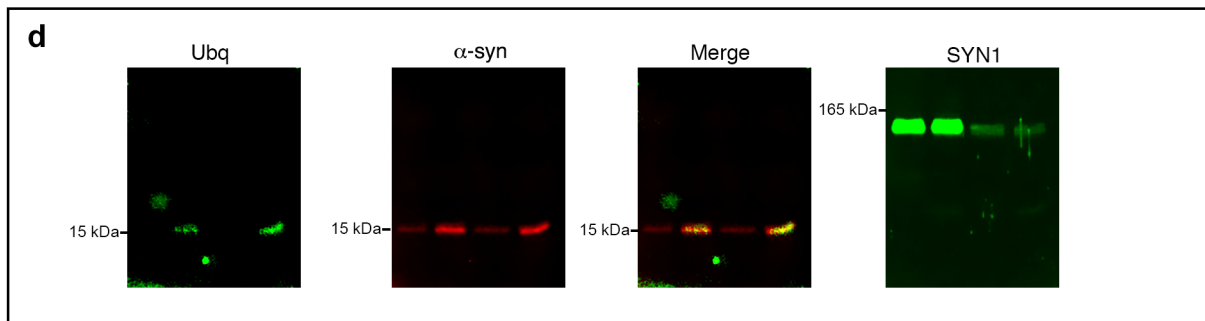

**Supplementary Figure 8 | Uncropped blots.** a-d, Uncropped blots from figure 4a (a), figure 4b (b), and supplementary figures S4a (c) and S4f (d) are depicted.



**Supplementary Table 1: Binding parameters of WT, A53T and E46K  $\alpha$ -syn to cardiolipin-containing LUVs**

| Type of LUV | WT              |               |             |                | A53T            |               |             |                | E46K            |               |             |                |
|-------------|-----------------|---------------|-------------|----------------|-----------------|---------------|-------------|----------------|-----------------|---------------|-------------|----------------|
|             | $K_D$ , $\mu$ M | n             | L           | R <sup>2</sup> | $K_D$ , $\mu$ M | n             | L           | R <sup>2</sup> | $K_D$ , $\mu$ M | n             | L           | R <sup>2</sup> |
| 8% CL       | ~ 3.7 mM        | N.D.          | N.D.        | 0.946          | ~ 4.2 mM        | N.D.          | N.D.        | 0.961          | 140.74 ±27.14   | 166.27 ±19.77 | 13.30 ±1.58 | 0.994          |
| 12% CL      | 199.69 ±22.46   | 296.00 ±16.22 | 35.52 ±1.95 | 0.998          | 438.11 ±54.61   | 202.00 ±32.24 | 24.24 ±3.87 | 0.996          | 56.59 ±12.74    | 146.77 ±11.44 | 17.61 ±1.37 | 0.996          |
| 17% CL      | 52.02 ±11.62    | 220.98 ±11.04 | 29.57 ±2.31 | 0.997          | 114.44 ±24.68   | 163.91 ±18.11 | 27.87 ±3.08 | 0.995          | 11.29 ±6.18     | 130.85 ±3.72  | 22.25 ±1.32 | 0.995          |
| 30% CL      | 1.11 ±2.33      | 98.51 ±7.71   | 29.57 ±2.31 | 0.993          | 2.36 ±4.13      | 95.34 ±10.31  | 28.6 ±3.09  | 0.987          | 8.37 ±4.69      | 86.34 ±6.21   | 25.90 ±1.86 | 0.994          |

Binding parameters ( $K_D$ , n, and L) were obtained from fitting of the data presented in Figure 5 (a-c) to equation 1 (see Methods). s.e.m was estimated by the fitting program (OriginPro 8) at the confidence level of 95%. n – the total number of lipid molecules in the bilayer that are involved in binding one molecule of protein (stoichiometry of binding). L – the number of cardiolipin (CL) molecules in the bilayer that are involved in binding one molecule of protein. Data represent mean  $\pm$  s.e.m. of 3 replicates.

**Supplementary Table 2: Efficacy of mAB- $\alpha$ -syn mediated capture of  $\alpha$ -syn from conditioned media**

|                                                     | Corr-hN-D60      | A53T-hN-D60     | Co-Culture      |
|-----------------------------------------------------|------------------|-----------------|-----------------|
| $\alpha$ -synuclein captured (ng ml <sup>-1</sup> ) | 10.85 $\pm$ 4.75 | 6.05 $\pm$ 2.80 | 6.98 $\pm$ 1.43 |

One mL of conditioned media from hiPSC-derived A53T, Corrected or Co-Cultured hNs was incubated for 24 hours at 37°C with 1ug of  $\alpha$ -syn-mAB conjugated to protein G dynabeads. The quantity of captured  $\alpha$ -syn was normalized against a standard curve of recombinant human  $\alpha$ -syn. Data represent mean  $\pm$  s.d. of 4 replicates. Mean values do not differ significantly.
